# Supplementary material for: AgPd nanoparticles supported on zeolitic imidazolate framework derived N-doped porous carbon as an efficient catalyst for formic acid dehydrogenation
Source: Royal Society of Chemistry journal article supplement (doi:10.1039/c5ra04157k), 2015-01-01
Supplement: c5ra04157k1.pdf [file c5ra04157k1.pdf]

**ELECTRONIC SUPPORTING INFORMATION (ESI)**

**AgPd nanoparticles supported on zeolitic imidazolate framework derived N-  
doped nanoporous carbon as efficient catalysts for formic acid  
dehydrogenation**

*Cheng Feng, Yunhui Hao, Li Zhang, Ningzhao Shang, Shutao Gao\*, Zhi Wang and  
Chun Wang\**

College of Science, Agricultural University of Hebei, Baoding 071001, China

### Calculation methods:

The turnover frequency (TOF) reported here is an apparent TOF value based on the number of Pd and Ag atoms in catalyst, which is calculated from the equation as follows:

$$TOF = \frac{P_{atm} V_{gas} / RT}{2n_{metal}t} \quad (S1)$$

where  $TOF$  is initial turnover frequency,  $P_{atm}$  is atmospheric pressure (101325 Pa),  $V_{gas}$  is the final generated volume of  $H_2/CO_2$  gas,  $R$  is the universal gas constant ( $8.3145 \text{ m}^3 \cdot \text{Pa} \cdot \text{mol}^{-1} \cdot \text{K}^{-1}$ ),  $T$  is the room temperature (298 K),  $n_{metal}$  is the mole number of the metallic catalyst and  $t$  is the reaction time of 5 min.

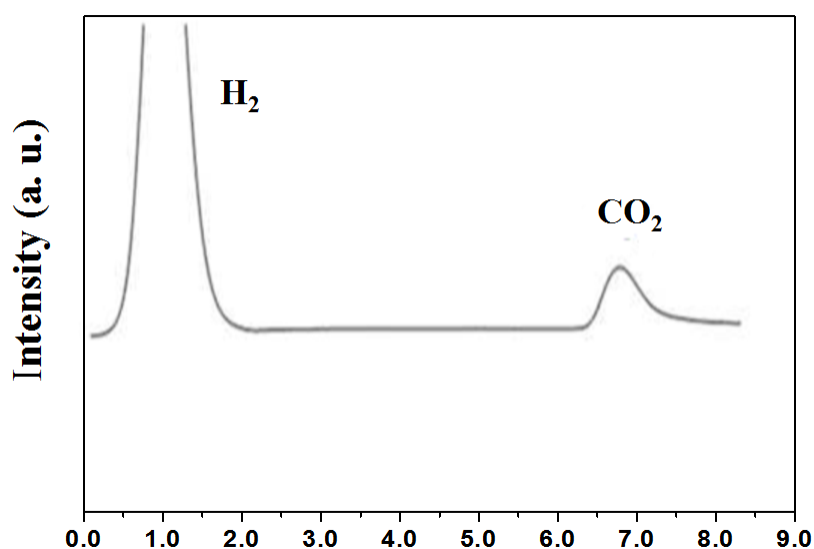

**Fig. S1** GC spectrum using TCD for the evolved gas from FA aqueous solution (1.25 M, 1.0 mL) over  $Ag_1Pd_4@ZIF8-C(1173)$  composite at 353 K ( $n_{metal}/n_{FA} = 0.01$ ).

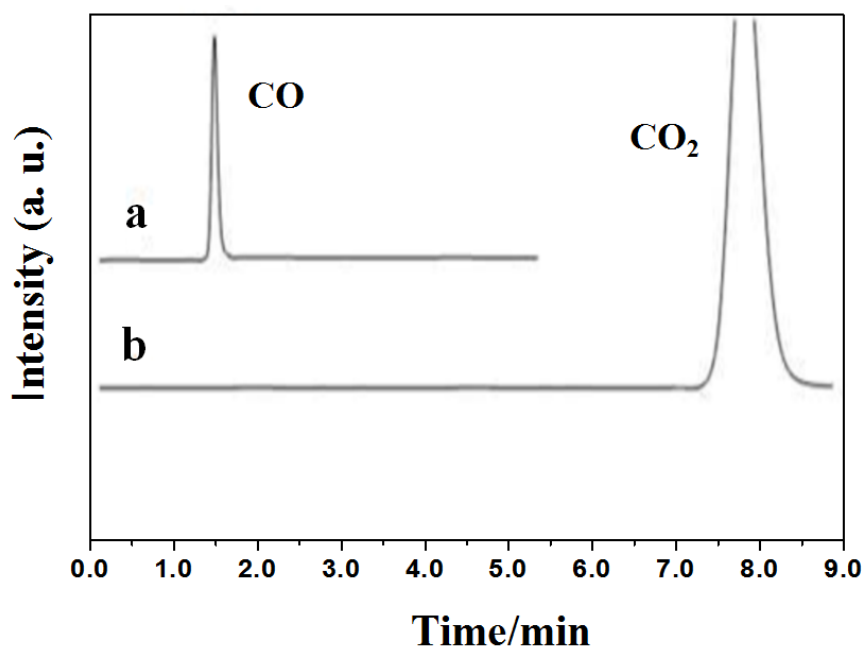

**Fig. S2** GC spectrum using FID-Methanator for the (a) commercial pure CO, and (b) evolved gas from FA aqueous solution (1.25 M, 1.0 mL) over  $\text{Ag}_1\text{Pd}_4@\text{ZIF8-C}(1173)$  composite at 353 K ( $n_{\text{metal}}/n_{\text{FA}} = 0.01$ ).

**Table S1** The metal mass content in the catalysts.

| Catalysts                                               | Pd mass content (%) | Ag mass content (%) |
|---------------------------------------------------------|---------------------|---------------------|
| $\text{Pd}_5@\text{ZIF8-C}(1173)$                       | 4.81                | 0.00                |
| $\text{Ag}_1\text{Pd}_4@\text{ZIF8-C}(1173)$            | 0.85                | 4.11                |
| $\text{Ag}_2\text{Pd}_3@\text{ZIF8-C}(1173)$            | 1.79                | 3.22                |
| $\text{Ag}_5@\text{ZIF8-C}(1173)$                       | 0.00                | 4.95                |
| $\text{Ag}_1\text{Pd}_4@\text{ZIF8-C}(1073)\text{-HCl}$ | 1.02                | 4.04                |
| $\text{Ag}_1\text{Pd}_4@\text{ZIF8-C}(1073)$            | 1.10                | 4.20                |
| $\text{Ag}_1\text{Pd}_4@\text{ZIF8-C}(1273)$            | 0.77                | 3.91                |

**Table S2** The recyclability Ag<sub>1</sub>Pd<sub>4</sub>@ZIF8-C(1173) for decomposition of FA<sup>a</sup>.

| Run | TOF <sup>b</sup> (h <sup>-1</sup> ) | V <sub>gas</sub> <sup>c</sup> (mL) |
|-----|-------------------------------------|------------------------------------|
| 1   | 936                                 | 56.5                               |
| 2   | 933                                 | 56.3                               |
| 3   | 928                                 | 56.0                               |
| 4   | 916                                 | 55.3                               |
| 5   | 900                                 | 54.3                               |

<sup>a</sup>. Reaction condition: FA aqueous solution (1.25 M, 1.0 mL) over Ag<sub>1</sub>Pd<sub>4</sub>@ZIF8-C(1173) at 353

K (n<sub>metal</sub>/n<sub>FA</sub> = 0.01);

<sup>b</sup>. TOF were calculated during the first 5 min of the reactions;

<sup>c</sup>. V<sub>gas</sub> were the volume of H<sub>2</sub> /CO<sub>2</sub> gas calculated during the first 5 min of the reactions.
